# Supplementary material
Source: PubMed Central journal article supplement (PMC4634081)
Supplement: supp_pp.15.01054_PP2015-01054R1_Supplemental_Material.pdf [file supp_pp.15.01054_PP2015-01054R1_Supplemental_Material.pdf]

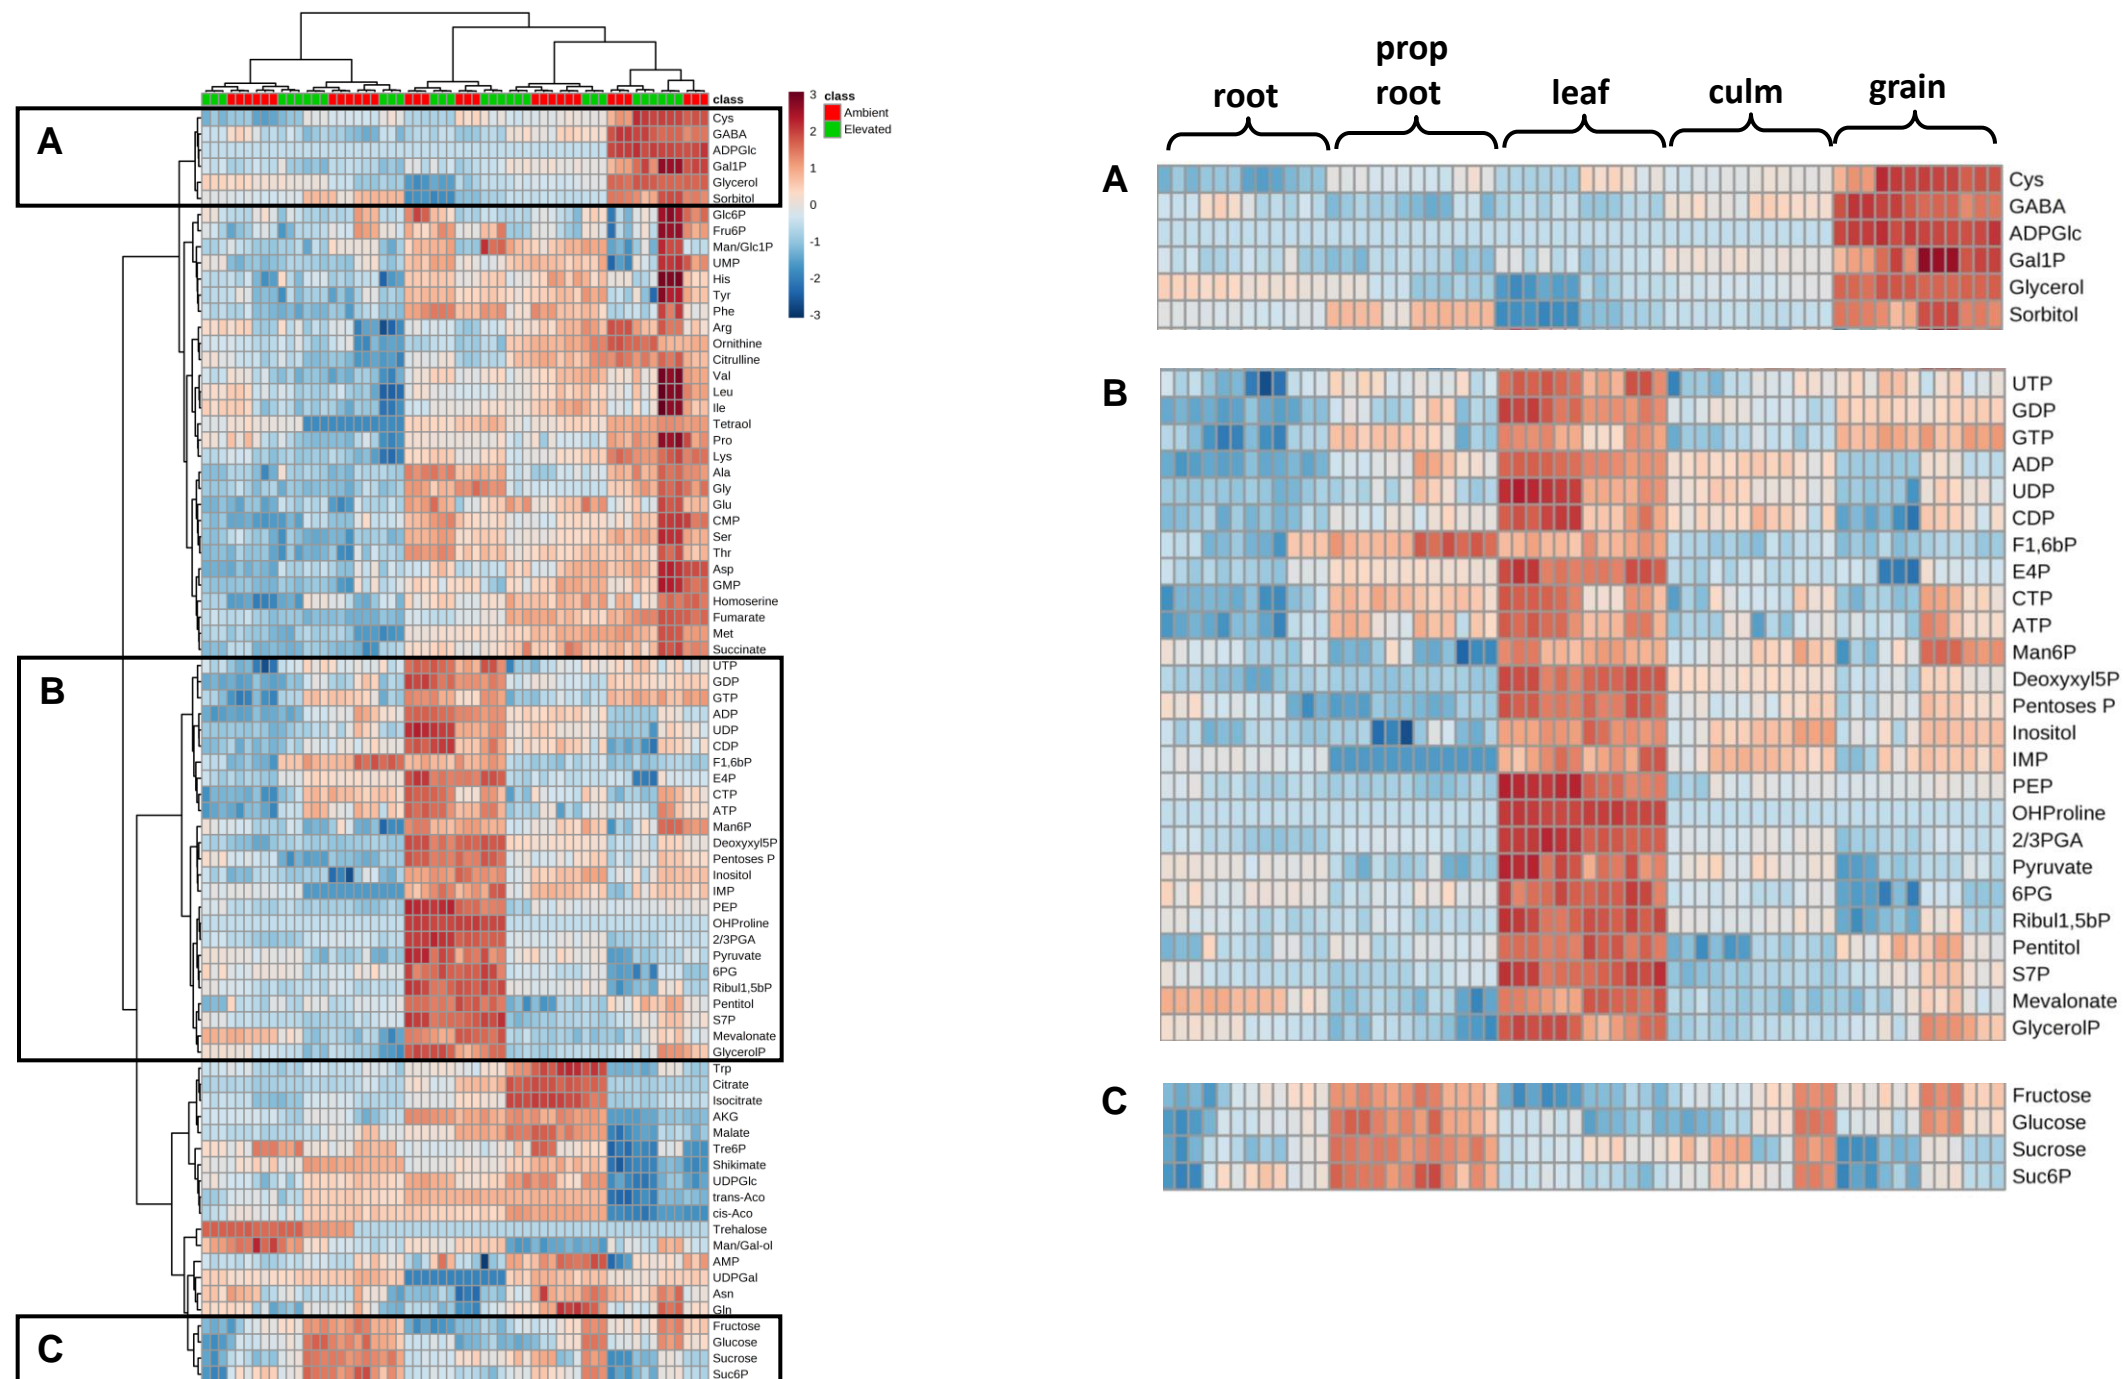

**Supplemental Fig S1.** Heatmap comparing the amount of metabolites among organs in *Sorghum bicolor* (cv. BRS 330). Independently of treatment or date of harvest, some metabolites were higher in **(A)** grains, **(B)** leaf, and **(C)** prop roots.

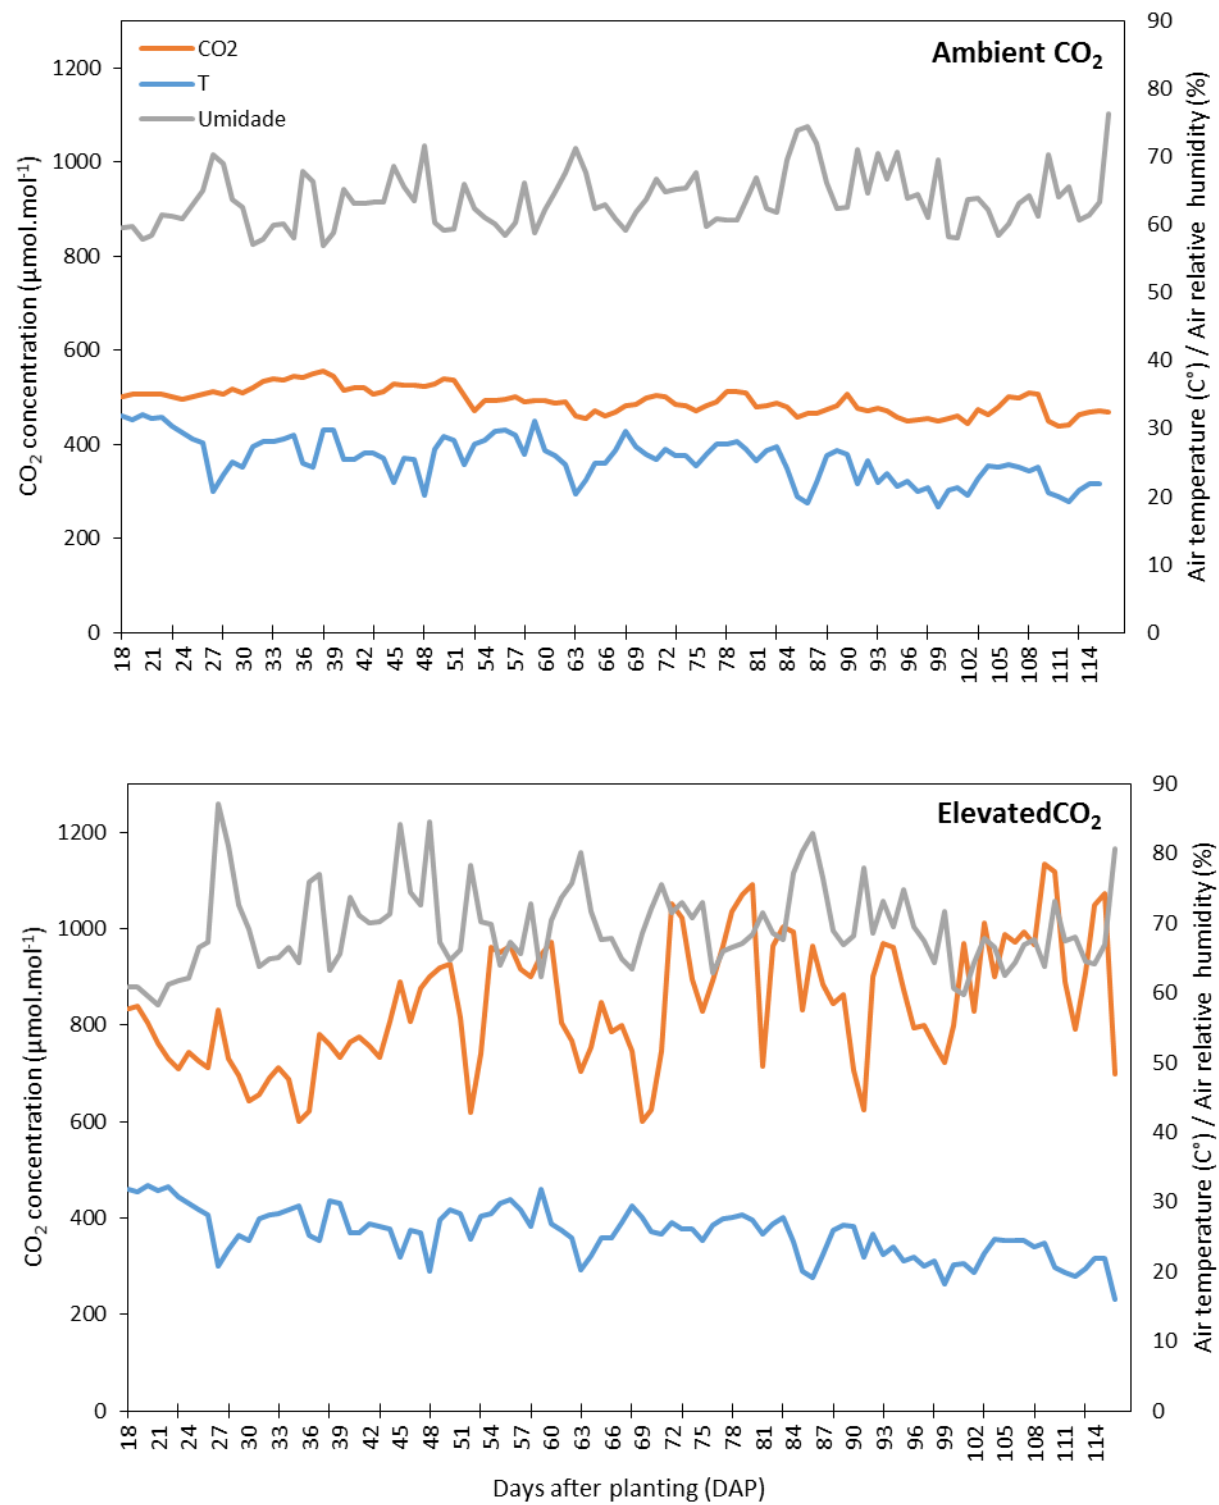

**Supplemental Fig S2.** Atmospheric CO<sub>2</sub> concentration (μmol.mol<sup>-1</sup>), air temperature and air relative humidity (%) inside the open-top chambers (OTCs) with ambient or elevated CO<sub>2</sub> along the experiment with *Sorghum bicolor*, cv. BRS330.  $n=2$ . CO<sub>2</sub> concentrations averaged  $482 \pm 27$  μmol.mol<sup>-1</sup> in ambient [CO<sub>2</sub>] chambers and  $840 \pm 130$  μmol.mol<sup>-1</sup> in elevated [CO<sub>2</sub>] chambers.
